# Supplementary material for: Polymorphisms in BMP2/BMP4, with estimates of mean lung dose, predict radiation pneumonitis among patients receiving definitive radiotherapy for non-small cell lung cancer
Source: PubMed Central journal article supplement (PMC5522129; doi:10.18632/oncotarget.17904), 2017-05-17
Supplement: oncotarget-08-43080-s001.pdf [file oncotarget-08-43080-s001.pdf]

## Polymorphisms in BMP2/BMP4, with estimates of mean lung dose, predict radiation pneumonitis among patients receiving definitive radiotherapy for non-small cell lung cancer

### Supplementary Materials

**Supplementary Table 1: Function prediction of tagging SNPs of BMP2 and BMP4**

| SNPs      | Chromosome | Allele | TFBS | miRNA | nsSNP |
|-----------|------------|--------|------|-------|-------|
| Rs170986  | 20         | A/C    |      | Y     |       |
| Rs1979855 | 20         | G/A    | Y    |       |       |
| Rs1980499 | 20         | C/T    | Y    |       |       |
| Rs235768  | 20         | A/T    |      |       | Y     |
| Rs3178250 | 20         | C/T    |      | Y     |       |
| Rs17563   | 14         | G/A    |      |       | Y     |
| Rs4898820 | 14         | G/T    | Y    |       |       |
| Rs762642  | 14         | C/A    | Y    |       |       |

*Abbreviations:* TFBS, transcriptional factor binding site; nsSNP, non-synonymous single nucleotide polymorphism.

**Supplementary Table 2: Genotypes distribution of studied SNPs**

| SNPs             | No. of patients |              |
|------------------|-----------------|--------------|
|                  | RP grade < 2    | RP grade ≥ 2 |
| <b>Rs170986</b>  |                 |              |
| AA               | 16              | 8            |
| AC               | 116             | 74           |
| CC               | 268             | 156          |
| <b>Rs1980499</b> |                 |              |
| CC               | 288             | 179          |
| CT               | 102             | 53           |
| TT               | 10              | 5            |
| <b>Rs235768</b>  |                 |              |
| AA               | 81              | 24           |
| AT               | 156             | 103          |
| TT               | 161             | 113          |
| <b>Rs3178250</b> |                 |              |
| CC               | 8               | 11           |
| CT               | 131             | 68           |
| TT               | 261             | 164          |
| <b>Rs1979855</b> |                 |              |
| AA               | 288             | 179          |
| AG               | 102             | 53           |
| GG               | 10              | 5            |
| <b>Rs17563</b>   |                 |              |
| AA               | 105             | 61           |
| AG               | 171             | 109          |
| GG               | 122             | 72           |
| <b>Rs4898820</b> |                 |              |
| GG               | 82              | 45           |
| GT               | 185             | 116          |
| TT               | 126             | 77           |
| <b>Rs762642</b>  |                 |              |
| AA               | 165             | 93           |
| AC               | 162             | 107          |
| CC               | 63              | 33           |
